# Supplementary material for: Optimized Treatment of Interleukin (IL-1)-Mediated Autoinflammatory Diseases: Impact of Disease Activity-Based Treatment Adjustments
Source: MDPI journal article supplement (doi:10.3390/jcm13082319), 2024-04-17
Supplement: s1 [file s1]

## Supplementary material

**Supplementary Table S1.** Detected gene variants

|                    | AMCG [22]<br>classification  | Variants                                | Heterozygous | Homozygous/<br>Compound<br>heterozygous |
|--------------------|------------------------------|-----------------------------------------|--------------|-----------------------------------------|
| <b>FMF (n=46)</b>  | (Likely) Pathogenic,<br>n=25 | <i>M694V, V726A,<br/>M680Ile, K695N</i> | 17           | 8                                       |
|                    | VUS, n=4                     | <i>V722M, E148Q,<br/>A511V</i>          | 4            | 0                                       |
| <b>CAPS (n=9)</b>  | (Likely) Pathogenic,<br>n=2  | <i>E311K, D303N</i>                     | 2            | 0                                       |
|                    | VUS, n= 7                    | <i>Q703K, V198M</i>                     | 7            | 0                                       |
| <b>TRAPS (n=1)</b> | Pathogenic, n=1              | <i>C55R</i>                             | 1            | 0                                       |

\*Homozygous: n=4, Compound heterozygous: n=4, n: Number of patients, FMF: Familial Mediterranean fever, CAPS: Cryopyrin-associated periodic syndrome, TRAPS: Tumor necrosis factor receptor-1-associated periodic syndrome, VUS: variant of unknown significance

**Supplementary Table 2.** Treatment at first study visit in children with IL-1 AID

| Treatment                    | Total<br>n=56 | FMF<br>n= 46 | CAPS<br>n= 9 | TRAPS<br>n=1 |
|------------------------------|---------------|--------------|--------------|--------------|
| <b>Baseline visit, n (%)</b> |               |              |              |              |
| Colchicine                   | 15 (27)       | 14 (30)      | 1 (11)       | 0            |
| Combination therapy          | 1 (2)         | 1 (2)        |              |              |
| - Anakinra plus colchicine   | 1 (2)         | 1 (2)        | 0            | 0            |

n: Number of patients, IQR: Interquartile range, FMF: Familial Mediterranean fever, CAPS: Cryopyrin-associated periodic syndrome, TRAPS: Tumor necrosis factor receptor-1-associated periodic syndrome, VUS: variant of unknown significance
